# Supplementary material
Source: MDPI journal article supplement (https://www.mdpi.com/2076-0760/11/3/100)
Supplement: s1 [file s1]

Supplementary Table S1  
*Parent Demographic Information*

|                                                                                                                                   | <u>Autism (n=21)</u> | <u>Neurotypical (n=21)</u> |
|-----------------------------------------------------------------------------------------------------------------------------------|----------------------|----------------------------|
| Mother's education (%)                                                                                                            |                      |                            |
| Some/completed college                                                                                                            | 11 (52.3%)           | 9 (42.8%)                  |
| Some/completed graduate school                                                                                                    | 9 (42.8%)            | 6 (28.6%)                  |
| Missing                                                                                                                           | 1 (4.8%)             | 3 (14.3%)                  |
| Mother's employment (%)                                                                                                           |                      |                            |
| Not Employed Outside Home                                                                                                         | 6 (28.6%)            | 3 (14.3%)                  |
| Employed Part-time                                                                                                                | 4 (19.0%)            | 6 (28.6%)                  |
| Employed Full-Time                                                                                                                | 10 (47.6%)           | 10 (47.6%)                 |
| Missing                                                                                                                           | 1 (4.8%)             | 2 (9.5%)                   |
| Father's education (%)                                                                                                            |                      |                            |
| Some/completed High School                                                                                                        | 3 (14.3%)            | 1 (4.8%)                   |
| Some/completed College                                                                                                            | 11 (52.3%)           | 13 (61.9%)                 |
| Some/completed Graduate School                                                                                                    | 5 (23.8%)            | 5 (23.8%)                  |
| Missing                                                                                                                           | 2 (9.5%)             | 2 (9.5%)                   |
| Father's employment (%)                                                                                                           |                      |                            |
| Not Employed Outside Home                                                                                                         | 3 (14.3%)            | 0 (0%)                     |
| Employed Part-time                                                                                                                | 2 (9.5%)             | 2 (9.5%)                   |
| Employed Full-Time                                                                                                                | 14 (66.7%)           | 17 (80.9%)                 |
| Missing                                                                                                                           | 2 (9.5%)             | 2 (9.5%)                   |
| Note: ASD = Autism Spectrum Disorder, TYP = Typically Developing. Participants were allowed to select multiple ethnicity choices. |                      |                            |

Supplementary Table S2

*Factor Loadings on Iowa Family Interaction Scales*

|                         | Child           |                 | Parent          |                 |
|-------------------------|-----------------|-----------------|-----------------|-----------------|
|                         | <u>Factor 1</u> | <u>Factor 2</u> | <u>Factor 1</u> | <u>Factor 2</u> |
| Hostility               | <b>-0.74</b>    | 0.04            | <b>-0.82</b>    | 0.21            |
| Angry Coercion          | <b>-0.59</b>    | <b>-0.03</b>    | <b>-0.72</b>    | 0.33            |
| Antisocial              | <b>-0.89</b>    | 0.01            | <b>-0.94</b>    | -0.13           |
| Warmth                  | <b>0.67</b>     | 0.00            | <b>0.80</b>     | -0.22           |
| Communication           | <b>0.88</b>     | 0.16            | <b>0.80</b>     | 0.28            |
| Listener Responsiveness | <b>0.89</b>     | 0.00            | <b>0.92</b>     | 0.10            |
| Prosocial               | <b>0.87</b>     | <b>-0.14</b>    | <b>0.78</b>     | -0.12           |
| Dominance               | <b>-0.30</b>    | <b>0.57</b>     | -0.04           | <b>0.69</b>     |
| Lecture/Moralize        | 0.20            | <b>0.84</b>     | -0.01           | <b>0.72</b>     |

Note: Extraction Method: Principal Axis factoring. Rotation Method: Oblimin with Kaiser Normalization
